# Supplementary material
Source: Elsevier journal article supplement (https://rcastoragev2.blob.core.windows.net/4e1addefd674e15a5eb4b0b024f5e499/mmc1.pdf)
Supplement: mmc1 [file mmc1.pdf]

# THE LANCET

## Healthy Longevity

### Supplementary appendix 1

This translation in Spanish was submitted by the authors and we reproduce it as supplied. It has not been peer reviewed. *The Lancet's* editorial processes have only been applied to the original in English, which should serve as reference for this manuscript.

Los autores nos proporcionaron esta traducción al español y la reproducimos tal como nos fue entregada. No la hemos revisado. Los procesos editoriales de *The Lancet* se han aplicado únicamente al original en inglés, que debe servir de referencia para este manuscrito.

Supplement to: Garo-Pascual M, Gaser C, Zhang L, Tohka J, Medina M, Strange BA. Brain structure and phenotypic profile of superagers compared with age-matched older adults: a longitudinal analysis from the Vallecas Project. *Lancet Healthy Longev* 2023; published online July 13. [https://doi.org/10.1016/S2666-7568\(23\)00079-X](https://doi.org/10.1016/S2666-7568(23)00079-X).

## Resumen

**Antecedentes:** Las capacidades cognitivas, y la memoria en particular, disminuyen normalmente con la edad. Sin embargo, algunos individuos designados como *superagers*, pueden llegar al final de su vida con una memoria comparable a la de individuos 30 años más jóvenes. Nuestro objetivo es caracterizar la estructura cerebral de los *superagers* e identificar los factores demográficos, de estilo de vida y clínicos asociados a este fenotipo.

**Métodos:** Seleccionamos a participantes cognitivamente sanos de 79,5 años o más en la cohorte longitudinal del Proyecto Vallecas reclutados entre el 10 de octubre de 2011 y el 14 de enero de 2014 en función de su puntuación de memoria episódica verbal diferida. Los participantes fueron evaluados con la prueba *Free and Cued Selective Reminding Test* (FCSRT) y con tres pruebas no basadas en la memoria (la versión de 15 ítems de la prueba Boston Naming Test, la prueba de sustitución dígito-símbolo, y la prueba de fluidez semántica con animales). Se clasificó a los participantes como *superagers* si obtenían puntuaciones iguales o superiores a los valores medios para una persona de 50-56 años en la prueba FCSRT, y valores dentro de una desviación estándar respecto de la media o superior para su edad y nivel educativo en las tres pruebas no basadas en la memoria, o como adultos mayores típicos si su puntuación estaba dentro de una desviación estándar respecto de la media para su edad y nivel educativo en la prueba FCSRT. Los datos se obtuvieron de acuerdo con el protocolo durante un máximo de seis seguimientos anuales.

**Resultados:** Se incluyeron 64 *superagers* (edad media 81,9 años; 38 [59%] mujeres y 26 [41%] hombres) y 55 adultos mayores típicos (82,4 años; 35 [41%] hombres). La mediana del número de seguimientos anuales fue 5,0 (Q1-Q3 5,0-6,0) para los *superagers* y 5,0 (4,5-6,0) para los adultos mayores típicos. Los *superagers* mostraron un mayor volumen de materia gris transversalmente en el lóbulo temporal medial, el prosencéfalo colinérgico y el tálamo motor. Longitudinalmente, los *superagers* también mostraron una atrofia más lenta en la materia gris respecto a los adultos mayores típicos, especialmente en el lóbulo temporal medial. Una clasificación de aprendizaje automático que incluía 89 predictores demográficos, de estilo de vida y clínicos mostró que una velocidad de movimiento más rápida (a pesar de que no había diferencias entre los grupos en cuanto a la frecuencia del ejercicio) y una mejor salud mental eran los factores que más diferenciaban a los *superagers* de los adultos mayores típicos. Las concentraciones similares de biomarcadores sanguíneos de demencia en los *superagers* y adultos mayores típicos sugieren que las diferencias de grupo reflejan la resistencia inherente de los *superagers* a la pérdida de memoria típica relacionada con la edad.

**Interpretación:** Los factores asociados con la prevención de la demencia también son relevantes para la resistencia al deterioro de la memoria y la atrofia cerebral relacionadas con la edad. La asociación entre ser *superager* y tener una mayor velocidad de movimiento podría proporcionar nuevas ideas sobre cómo preservar la función de la memoria en la novena década.

**Financiación:** Fundación Reina Sofía, Fundación CIEN, Ministerio de Ciencia e Innovación, Alzheimer's Association, Consejo Europeo de Investigación, Fundación MAPFRE, Fundación Carl Zeiss y Comisión Europea Horizonte 2020.
